# Supplementary material
Source: PubMed Central journal article supplement (PMC2638948)
Supplement: ern236_1.pdf [file ern236_1.pdf]

**Expression analysis of the Arabidopsis CP12 gene family suggests novel roles for these proteins in roots and floral tissues.**

*Prashant Singh, Dimitrios Kaloudas, and Christine A Raines*

Supplementary Material

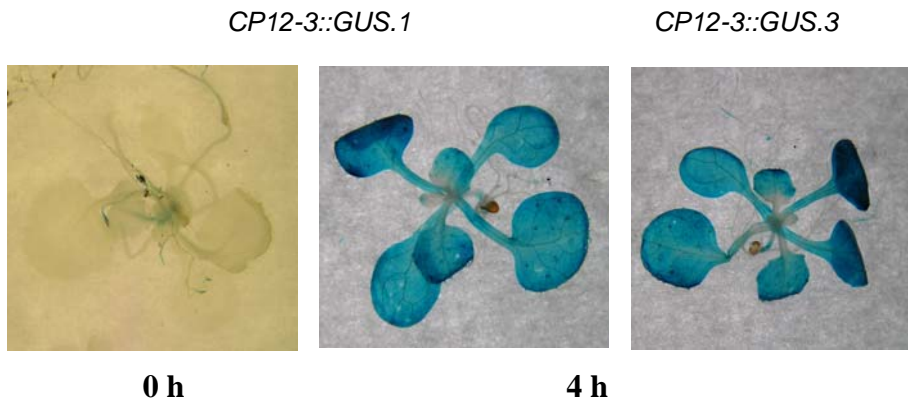

**Figure S1.** Histochemical staining of two *CP12-3::GUS* lines after anaerobic treatment. Transgenic *Arabidopsis* seedlings were grown for 14 days in petri dishes containing  $\frac{1}{2}$  strength MS with 1% sucrose, 14 h light/10 h dark and seedlings were then subjected to a 4 h anaerobic treatment by submerging seedlings in water for four hours prior to staining.

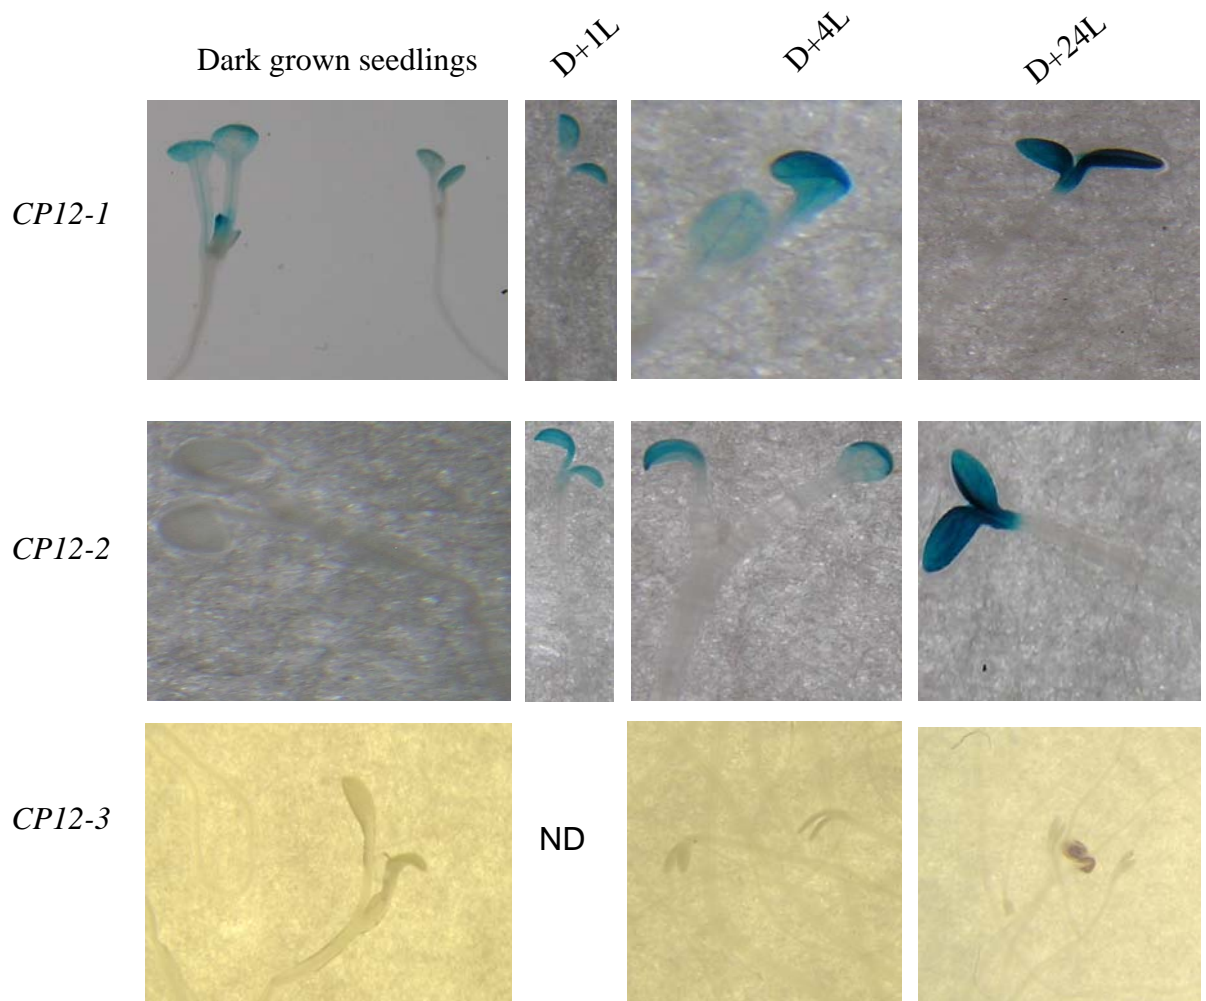

**Figure S 2.** GUS expression analysis in the *CP12-1::GUS*, *CP12-2::GUS* and *CP12-3::GUS* transgenic lines in dark grown seedlings. Transgenic *Arabidopsis* seedlings were grown in the dark for 10-12 days in petri dishes containing ½ strength MS with 1% sucrose and subjected to GUS staining. Additional dark grown plants were illuminated for 1 (D+ 1L), 4 (D + 4L) or 24 h (D + 24L) before staining.

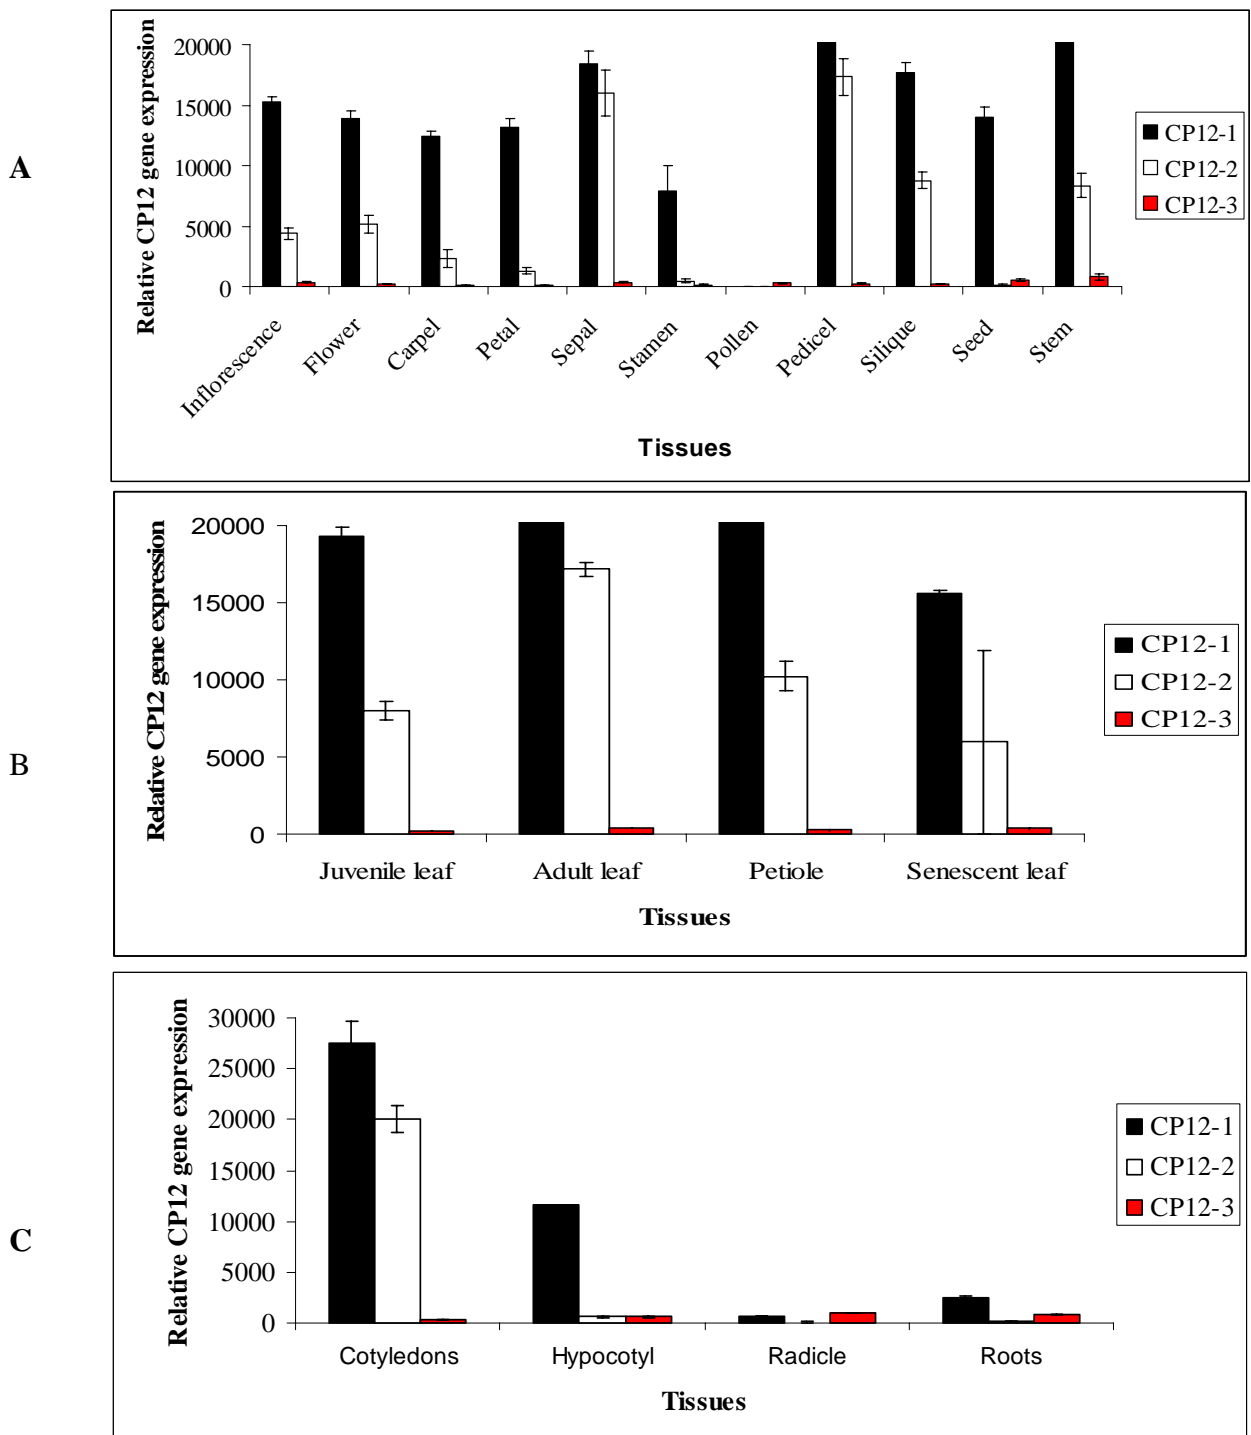

**Figure S3:** Expression profiling data for the Arabidopsis *CP12* genes. The figure was modified from an output result of Gene Atlas of Genevestigator. Error bars represent the standard deviation (n=3).
